# Supplementary material for: Red blood cell membrane-coated biomimetic upconversion nanoarchitectures for synergistic chemo-photodynamic therapy
Source: Royal Society of Chemistry journal article supplement (doi:10.1039/d1nj04305f), 2021-01-01
Supplement: d1nj04305f1.pdf [file d1nj04305f1.pdf]

Supporting information

# Red blood cell membrane-coated biomimetic upconversion nanoarchitecture for synergistic chemo-photodynamic therapy

Minghui Li <sup>†a</sup>, Xinyu Cui <sup>†b</sup>, Feng Wei <sup>a</sup>, Zhao Wang <sup>a</sup>, and Xiaojun Han <sup>a\*</sup>

<sup>a</sup> State Key Laboratory of Urban Water Resource and Environment, School of Chemical Engineering and Technology, Harbin Institute of Technology, Harbin, China

<sup>b</sup> Department of Public Health, Mudanjiang Medical University, Mudanjiang, China

E-mail: [hanxiaojun@hit.edu.cn](mailto:hanxiaojun@hit.edu.cn)

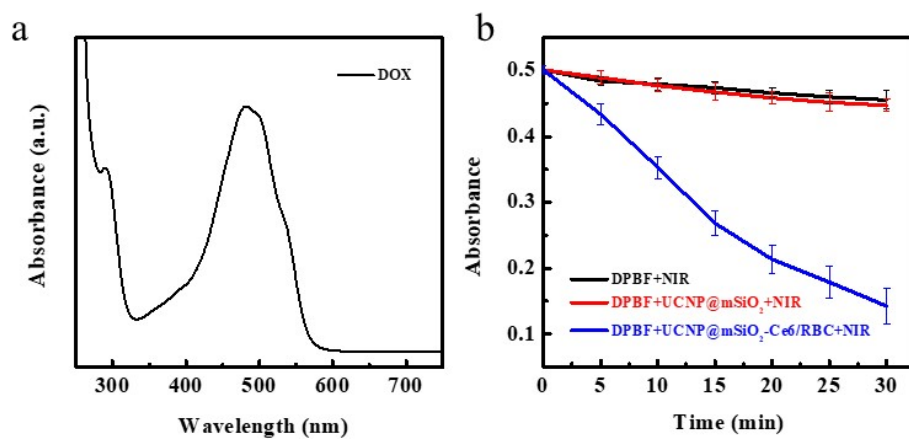

Fig. S1. (a) UV-Vis spectrum of DOX and (b) the absorbance of DPBF under different experimental conditions as a function of time.

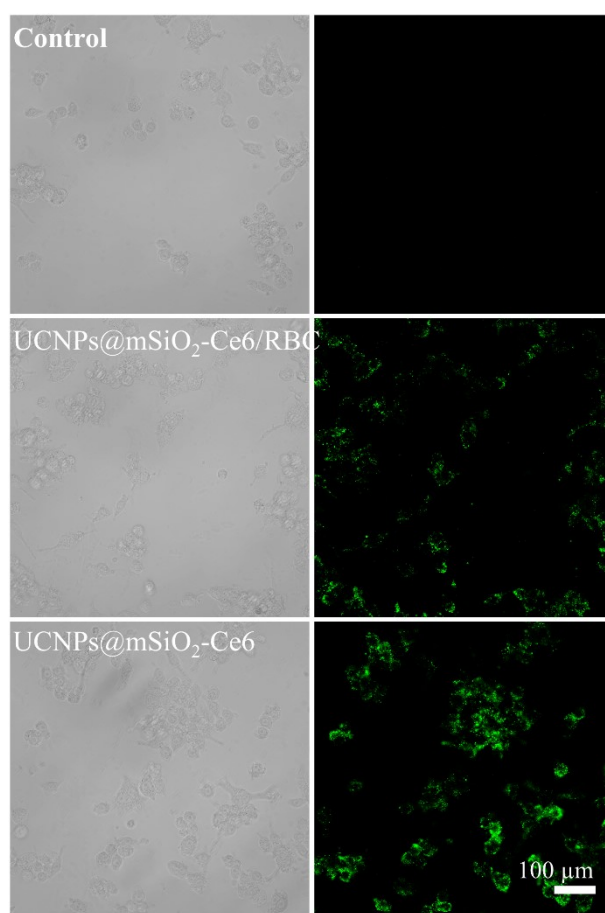

Fig. S2. CLSM images of RAW264.7 cells cultured with UCNPs@mSiO<sub>2</sub>-Ce6 and UCNPs@mSiO<sub>2</sub>-Ce6 RBC NPs.

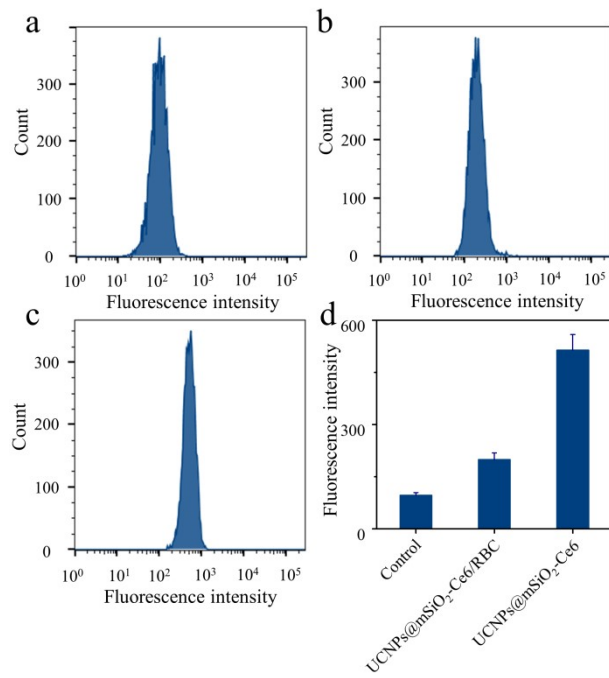

Fig. S3. Quantitative analysis of RAW264.7 cells by flow cytometry: (a) control, (b) UCNPs@mSiO<sub>2</sub>-Ce6, (c) UCNPs@mSiO<sub>2</sub>-Ce6 RBC NPs, and correspondingly (d) mean fluorescence intensity.

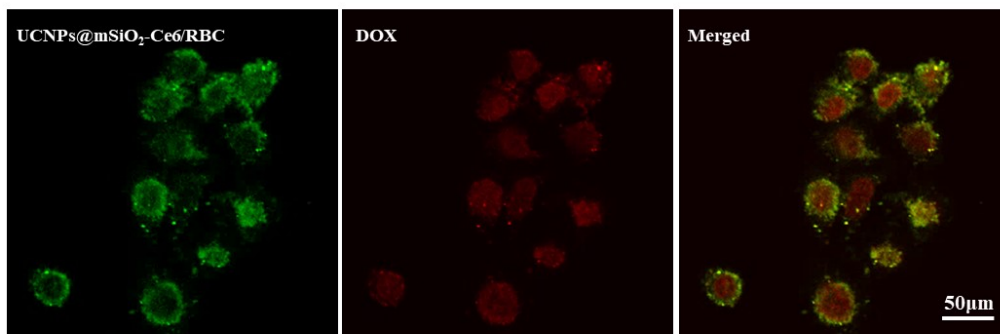

Fig. S4. Uptakes of DOX/UCNPs@mSiO<sub>2</sub>-Ce6/RBC NPs by HepG2 cells.

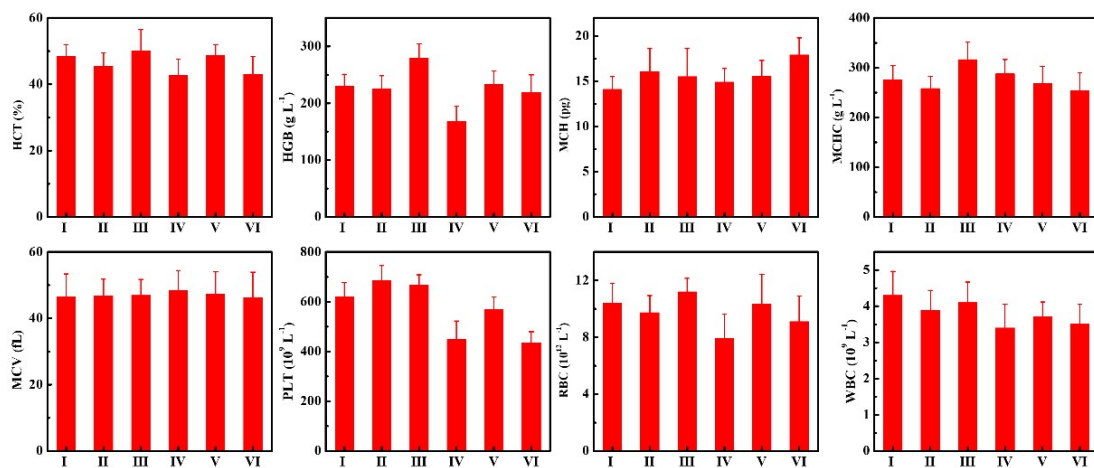

Fig. S5. The blood hematology analysis (n=6): (I) Control, (II) NIR, (III) UCNPs@mSiO<sub>2</sub>-Ce6/RBC, (IV) DOX/UCNPs@mSiO<sub>2</sub>-Ce6/RBC, (V) UCNPs@mSiO<sub>2</sub>-Ce6/RBC+NIR, (VI) DOX/UCNPs@mSiO<sub>2</sub>-Ce6/RBC+NIR.

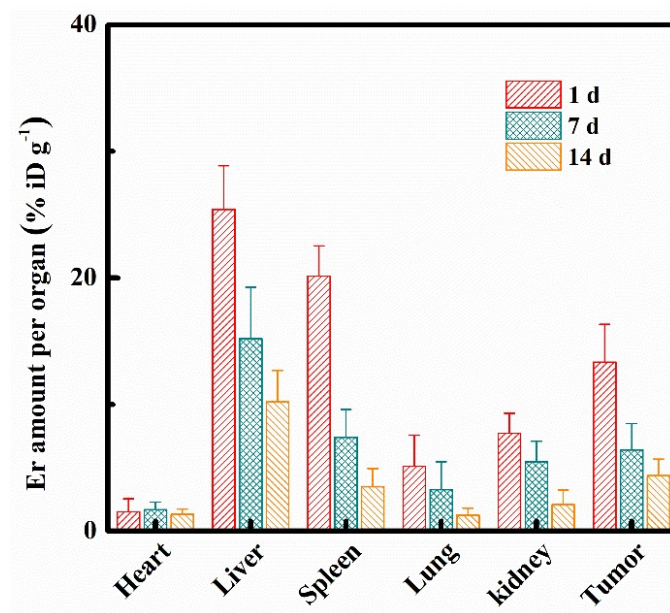

Fig. S6. Biodistribution of UCNPs@mSiO<sub>2</sub>-Ce6/RBC NPs in main organs and tumors of mice after intravenous injection at different time points.

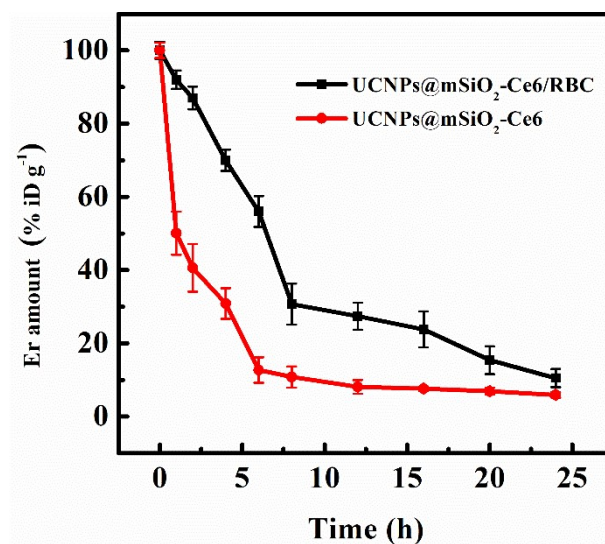

Fig. S7. The erbium content of UCNPs@mSiO<sub>2</sub>-Ce6/RBC NPs or UCNPs@mSiO<sub>2</sub>-Ce6 NPs in the blood of mice after intravenous injection at different time points.
